# Supplementary material for: Two-dimensional HfS2–ZrS2 lateral heterojunction FETs with high rectification and photocurrent
Source: Royal Society of Chemistry journal article supplement (doi:10.1039/d3nr03017b), 2023-01-01
Supplement: d3nr03017b1.pdf [file d3nr03017b1.pdf]

## Supplementary Material

### Two Dimensional HfS<sub>2</sub>-ZrS<sub>2</sub> Lateral Heterojunction FETs with High Rectification and Photocurrent

Lin Li,<sup>a,b</sup> Peize Yuan,<sup>c</sup> Zinan Ma,<sup>a</sup> Mengjie He,<sup>a</sup> Yurong Jiang,<sup>a</sup> Tianxing Wang,<sup>a</sup>

Congxin Xia,<sup>a</sup> Xueping Li<sup>a,c,\*</sup>

---

<sup>a</sup> School of physics, Henan Key Laboratory of Infrared Materials & Spectrum Measures and Applications, Henan Normal University, Xinxiang, Henan 453007, China.

<sup>b</sup> College of Physics and Optoelectronic Engineering, Zhengzhou Key Laboratory of Low-dimensional Quantum Materials and Devices, Zhongyuan University of Technology, Zhengzhou, 450007, China.

<sup>c</sup> College of Electronic and Electrical Engineering, Henan Normal University, Xinxiang, Henan 453007, China

\* E-mail: [lxpslxhww@126.com](mailto:lxpslxhww@126.com)

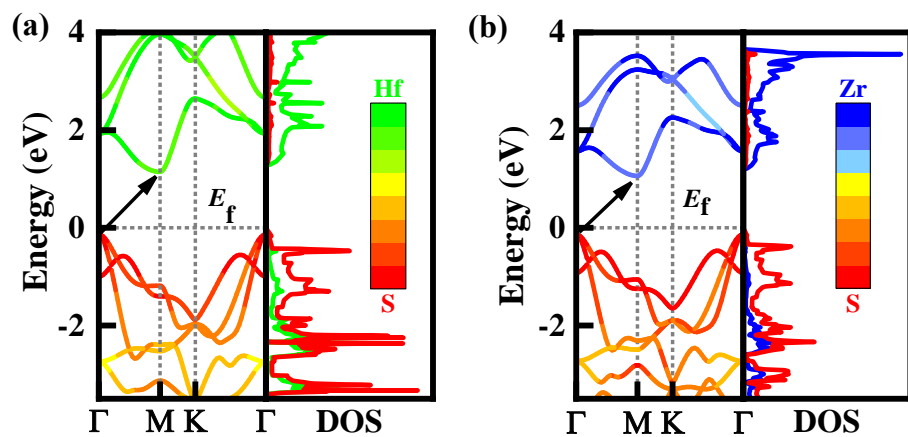

Fig. S1. The projected band structures for monolayer (a) HfS<sub>2</sub> and (b) ZrS<sub>2</sub>.

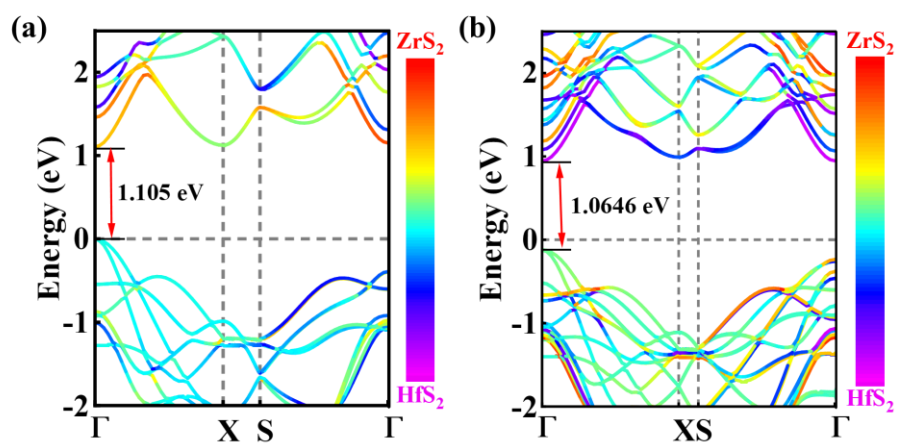

Fig. S2. The projected band structures for monolayer (a)  $(\text{HfS}_2)_1\text{-(ZrS}_2)_1$  and (b)  $(\text{HfS}_2)_2\text{-(ZrS}_2)_2$  lateral heterojunction.

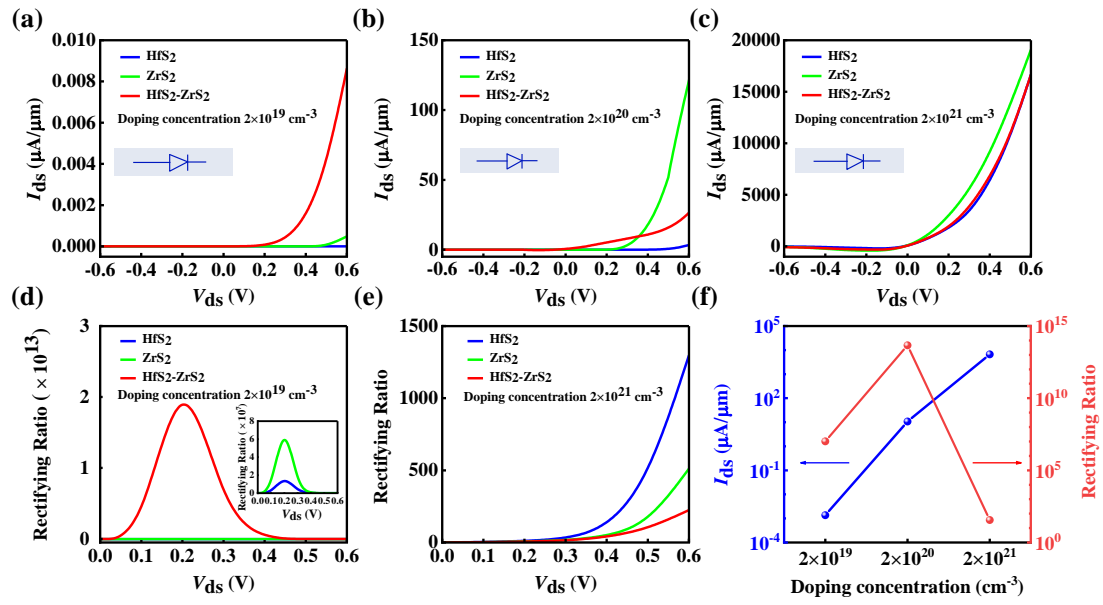

Fig. S3. (a-e) Bias dependent current and rectifying ratio curves of the monolayer diodes with different doping concentrations. (f) The doping concentrations dependent  $I_{ds}$  and rectifying ratio curves of the monolayer HfS<sub>2</sub>-ZrS<sub>2</sub> lateral diodes.

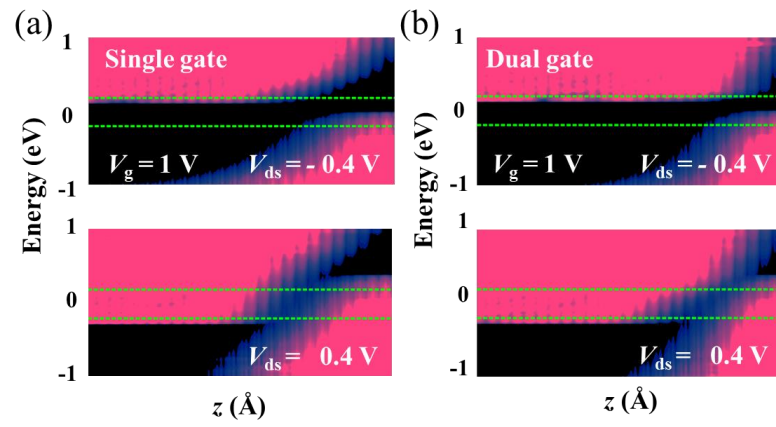

Fig. S4. PDOS of (a) single- and (b) dual-gate under  $\pm 0.4$  V bias and 1 V gate voltage.

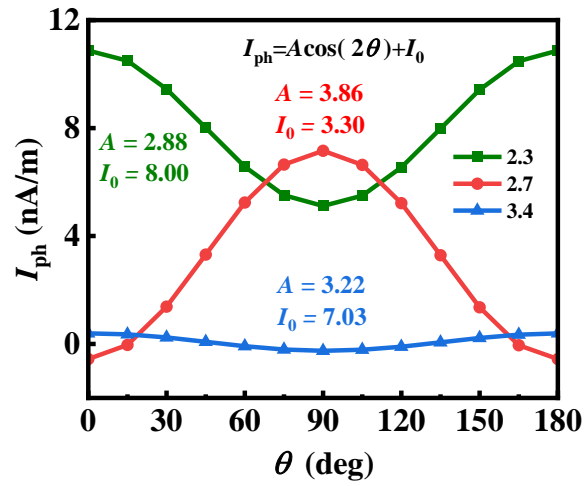

Fig. S5. The photocurrent density of monolayer HfS<sub>2</sub>-ZrS<sub>2</sub> lateral heterojunction induced by linearly polarized light respectively at zero bias voltage for photon energies of 2.3, 2.7 and 3.4 eV, respectively.

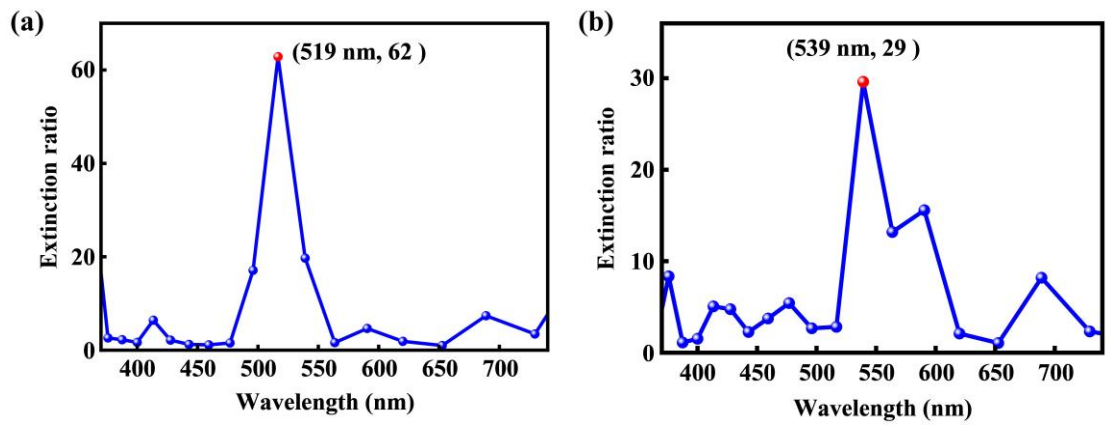

Fig. S6. Extinction ratio of the photocurrent for the monolayer (a)HfS<sub>2</sub>- and (b)ZrS<sub>2</sub>-based photodetectors.
